# Supplementary material for: The Physiological Impact of GFLV Virus Infection on Grapevine Water Status: First Observations
Source: MDPI journal article supplement (doi:10.3390/plants11020161), 2022-01-07
Supplement: s1 [file s1]

*Supplementary Materials*

# The Physiological Impact of GFLV Virus Infection on Grapevine Water Status

Anastazija Jež-Krebelj<sup>1,2,3,4,\*</sup>, Maja Rupnik-Cigoj<sup>1,2,3</sup>, Marija Stele<sup>2</sup>, Marko Chersicola<sup>2</sup>, Maruša Pompe-Novak<sup>1,2</sup> and Paolo Sivilotti<sup>1,5</sup>

<sup>1</sup> School for Viticulture and Enology, University of Nova Gorica (UNG), Glavni trg 8, 5271 Vipava, Slovenia;

<sup>2</sup> Department of Biotechnology and Systems Biology, National Institute of Biology (NIB), Večna Pot 111, 1000 Ljubljana, Slovenia

<sup>3</sup> Regional Development Agency of Northern Primorska Ltd. Nova Gorica (RRA SP), Trg Edvarda Kardelja 3, 5000 Nova Gorica, Slovenia

<sup>4</sup> Department of Fruit Growing, Viticulture and Oenology, Agricultural Institute of Slovenia (KIS), Hacquetova ulica 17, 1000 Ljubljana, Slovenia

<sup>5</sup> Department of AgriFood, Environmental and Animal Sciences, University of Udine, via Palladio 8, 33100 Udine, Italy

\* Correspondence: anastazija.jezkrebelj@kis.si

**Citation:** Jež-Krebelj, A.; Rupnik-Cigoj, M.; Stele, M.; Chersicola, M.; Pompe-Novak, M.; Sivilotti, P. The Physiological Impact of GFLV Virus Infection on Grapevine Water Status: First Observations. *Plants* **2022**, *11*, 161. <https://doi.org/10.3390/plants11020161>

Academic Editor: Mario Ciaffi

Received: 22 December 2021

Accepted: 5 January 2022

Published: 7 January 2022

**Publisher's Note:** MDPI stays neutral with regard to jurisdictional claims in published maps and institutional affiliations.

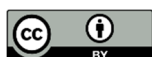

**Copyright:** © 2022 by the authors. Licensee MDPI, Basel, Switzerland. This article is an open access article distributed under the terms and conditions of the Creative Commons Attribution (CC BY) license (<https://creativecommons.org/licenses/by/4.0/>).

Supplemental Table S1: Significance of ANOVA in stem water potential ( $\Psi_{\text{STEM}}$ ), root hydraulic conductivity (RHC), and vessel parameters among the four treatments under comparison in the potted own-rooted grapevines of cv. Schioppettino.

| The days before/after the start of different water regime | ( $\Psi_{\text{STEM}}$ ) | RHC | diameter of open xylem | diameter of occluded xylem | Portion of area of occluded xylem elements in the total area of cross sections of all xylem elements (%) |
|-----------------------------------------------------------|--------------------------|-----|------------------------|----------------------------|----------------------------------------------------------------------------------------------------------|
| -9                                                        | ns                       | ns  | ---                    | ---                        | ---                                                                                                      |
| 0                                                         | *                        | **  | ns                     | ns                         | ns                                                                                                       |
| 3                                                         | *                        | --- | ---                    | ---                        | ---                                                                                                      |
| 6                                                         | ns                       | ns  | ns                     | *                          | *                                                                                                        |
| 9                                                         | ns                       | --- | ---                    | ---                        | ---                                                                                                      |
| 12                                                        | **                       | **  | ns                     | ns                         | ns                                                                                                       |
| 15                                                        | ***                      | ns  | ns                     | ns                         | *                                                                                                        |

Supplemental Table S2: Significance of ANOVA in 9-cis-epoxycarotenoid dioxygenase 1 (*NCED1*), 9-cis-epoxycarotenoid dioxygenase 2 (*NCED2*), WRKY encoding transcription factor (*WRKY54*) and RD22-like protein (*RD22*), genes among the four treatments under comparison in the potted own-rooted grapevines of cv. Schioppettino.

| The days before/after the start of different water regime | <i>NCED1</i> | <i>NCED2</i> | <i>WRKY54</i> | <i>RD22</i> |
|-----------------------------------------------------------|--------------|--------------|---------------|-------------|
| 0                                                         | ns           | ns           | ns            | ns          |
| 9                                                         | ns           | ns           | ns            | ns          |
| 12                                                        | ns           | ns           | ns            | *           |

Supplemental Table S3: Daily irrigation applied to each vine from the beginning to the end of the experiment of the well-watered (WW) and water-stressed (WS) plants, and environmental conditions monitored in the greenhouse during the course of the experiment.

|      | Daily irrigation (L pot <sup>-1</sup> d <sup>-1</sup> ) |      | Daily temperature (°C) |       |       |                       |
|------|---------------------------------------------------------|------|------------------------|-------|-------|-----------------------|
| date | WW                                                      | WS   | T min                  | T med | T max | Relative Humidity (%) |
| 15/6 | 0.24                                                    | 0.24 | 12.8                   | 20.7  | 26.9  | 76                    |
| 16/6 | 0.25                                                    | 0.25 | 14.6                   | 22.6  | 29.0  | 76                    |
| 17/6 | 0.25                                                    | 0.25 | 15.8                   | 24.5  | 31.1  | 72                    |
| 18/6 | 0.25                                                    | 0.25 | 19.0                   | 26.3  | 33.2  | 62                    |
| 19/6 | 0.25                                                    | 0.25 | 17.1                   | 26.4  | 33.6  | 63                    |
| 20/6 | 0.26                                                    | 0.26 | 19.4                   | 26.9  | 33.3  | 67                    |
| 21/6 | 0.26                                                    | 0.26 | 20.3                   | 27.2  | 33.1  | 65                    |
| 22/6 | 0.26                                                    | 0.26 | 22.1                   | 27.3  | 32.0  | 49                    |
| 23/6 | 0.26                                                    | 0.26 | 20.5                   | 25.6  | 28.7  | 52                    |
| 24/6 | 0.26                                                    | 0.26 | 19.2                   | 25.5  | 31.6  | 57                    |
| 25/6 | 0.26                                                    | 0.26 | 19.0                   | 23.6  | 29.9  | 71                    |
| 26/6 | 0.26                                                    | 0.26 | 16.9                   | 23.1  | 29.4  | 56                    |
| 27/6 | 0.25                                                    | 0    | 14.8                   | 23.3  | 29.9  | 65                    |
| 28/6 | 0.26                                                    | 0    | 17.0                   | 24.1  | 30.4  | 69                    |
| 29/6 | 0.26                                                    | 0    | 17.5                   | 25.4  | 31.5  | 68                    |
| 30/6 | 0.27                                                    | 0    | 19.7                   | 26.7  | 33.2  | 71                    |
| 1/7  | 0.27                                                    | 0    | 20.3                   | 27.5  | 34.7  | 71                    |
| 2/7  | 0.28                                                    | 0    | 20.2                   | 28.8  | 37.4  | 59                    |
| 3/7  | 0.28                                                    | 0    | 20.2                   | 26.9  | 32.7  | 70                    |
| 4/7  | 0.28                                                    | 0    | 19.5                   | 26.3  | 32.6  | 68                    |
| 5/7  | 0.28                                                    | 0    | 20.7                   | 26.4  | 32.5  | 66                    |
| 6/7  | 0.28                                                    | 0    | 17.7                   | 23.2  | 30.0  | 74                    |
| 7/7  | 0.27                                                    | 0    | 16.6                   | 24.4  | 30.5  | 75                    |
| 8/7  | 0.27                                                    | 0    | 19.0                   | 25.5  | 31.7  | 71                    |
| 9/7  | 0.28                                                    | 0    | 17.1                   | 26.0  | 32.7  | 66                    |
| 10/7 | 0.28                                                    | 0.28 | 21.0                   | 26.0  | 32.4  | 57                    |
| 11/7 | 0.29                                                    | 0.29 | 17.2                   | 24.8  | 31.6  | 72                    |
| 12/7 | 0.28                                                    | 0.28 | 16.5                   | 23.3  | 28.9  | 68                    |
| 13/7 | 0.28                                                    | 0.28 | 17.8                   | 21.9  | 26.2  | 66                    |

Supplemental Table S4: Primers and probes used for gene expression analysis.

| Gene name | Target gene ID | Description                         | Forward primer sequence                                                                         | Source |
|-----------|----------------|-------------------------------------|-------------------------------------------------------------------------------------------------|--------|
|           |                |                                     | Reverse primer sequence                                                                         |        |
|           |                |                                     | Probe sequence                                                                                  |        |
|           |                |                                     |                                                                                                 |        |
| NCED1     | AY337613       | 9-cis-epoxycarotenoid dioxygenase 1 | TCCCTCACGAGTTCCTATG<br>ATATGCGGACCATCCCTCT                                                      | [66]   |
| NCED2     | AY337614       | 9-cis-epoxycarotenoid dioxygenase   | GAATAGGGTTTTGGGGGAAC<br>GGAAGATCCAAGAGAGGGAAA                                                   | [66]   |
| RD22      | NM_001281183.1 | RD22-like protein                   | CCCATCCTTGCTCTTATCTCT<br>CACCTCCAGGTTTTCCATTTC                                                  | [67]   |
| WRKY54    | Vv_10004898    | WRKY encoding transcription factor  | TCCCATATGAGAAAGGAAGAG<br>TCCGTCTACACCGCAGTC                                                     | [68]   |
| COX       | X83206         | cytochrome oxidase                  | CGTCGCATTCCAGATTATCCA<br>CAACTACGGATATATAAGAGCCAAAAGT<br>FAM-TGCTTACGCTGGATGGAATGCCCT-TA<br>MRA | [69]   |
| UBI_CF    | Vitvi19g00744  | ubiquitin-conjugating enzyme 28     | CTATATGCTCGCTGCTGACG<br>AAGCCAGGCAGAGACAAGTC                                                    | [70]   |
